# Supplementary material for: Superparamagnetic mesoporous ferrite nanocrystal clusters for efficient removal of arsenite from water
Source: Royal Society of Chemistry journal article supplement (doi:10.1039/c3ce40944a), 2013-01-01
Supplement: c3ce40944a.pdf [file c3ce40944a.pdf]

## Supplementary Information

# Superparamagnetic mesoporous ferrite nanocrystal clusters for efficient removal of arsenite from water

Wei-Hong Xu, <sup>\*a</sup> Lei Wang, <sup>a</sup> Jing Wang, <sup>a</sup> Guo-Ping Sheng, <sup>b</sup> Jin-Huai Liu, <sup>a</sup> Han-Qing Yu<sup>b</sup> and Xing-Jiu Huang<sup>\*a</sup>

<sup>a</sup>Nano-Materials and Environmental Detection Laboratory, Hefei Institute of  
Intelligent Machines, Chinese Academy of Sciences, Hefei, 230031, China

<sup>b</sup>Department of Chemistry, University of Science and Technology of China, Hefei,  
230026, China

## 1. High Water-Dispersibility of Adsorbents

The as-prepared  $\text{MnFe}_2\text{O}_4$  and calcined  $\text{MnFe}_2\text{O}_4$  NCs are highly water dispersible and keep a stable dispersion for about half one day owing to the electrostatic repulsion and superparamagnetic effect. The surface of both NCs possesses positive charges under neutral conditions through zeta potential measurement because both NCs had a zero point of zeta potential at pH about 8.5 (Fig. S4). The superparamagnetic NCs do not aggregate in solution because of no magnetic interaction between each other.[1] Taking  $\text{MnFe}_2\text{O}_4$  NCs as an example, the  $\text{MnFe}_2\text{O}_4$  NCs were well dispersed in solution, (Fig. S5a). When a magnet (4000 Oe) was placed beside the vial, the ferrite NCs were separated from their dispersion rapidly within one minute due to the superparamagnetic property and high saturation magnetization (Fig. S5b). Once the magnet was taken away, the NCs could be re-dispersed into the solution immediately by slight shaking (Fig. S5c).

## 2. As(III) Adsorption Equilibrium Modeling

The Langmuir adsorption model can be represented in linear form as follows: [2]

$$\frac{1}{q_e} = \frac{1}{q_{\max} b} \times \frac{1}{C_e} + \frac{1}{q_{\max}} \quad \text{S1}$$

where  $q_e$  is the equilibrium adsorption capacity (mg/g),  $C_e$  is the equilibrium concentration (mg/L),  $q_{\max}$  represents the maximum amount of As(III) adsorbed on per unit weight of adsorbent to form a complete monolayer on the surface(mg/g),  $b$  is the Langmuir constant that directly relates to the adsorption affinity (L/mg).

Langmuir parameters,  $q_{\max}$  and  $b$  are calculated from the slop and intercept of the

linear plots of  $1/q_e$  vs  $1/C_e$  (Figs. S8 and S9).

The linear form of Freundlich adsorption model is as follows: [2]

$$\log(q_e) = \log K_f + \frac{1}{n} \log(C_e) \quad \text{S2}$$

where  $K_f$  and  $1/n$  are Freundlich constants, related to adsorption capacity and adsorption intensity (heterogeneity factor) respectively. The values of  $K_f$  and  $1/n$  are obtained from the slop and intercept of the linear Freundlich plot of  $\log(q_e)$  vs  $\log(C_e)$  (Figs. S8 and S9).

The D-R isotherm model can be represented in linear form as follows: [2]

$$\ln q_e = \ln Q_m - k_{ads} \varepsilon^2 \quad \text{and} \quad \varepsilon = RT \ln(1 + \frac{1}{C_e}) \quad \text{S3}$$

where  $Q_m$  is the theoretical adsorption capacity (mg/g),  $K_{ads}$  is a constant related to adsorption energy,  $\varepsilon$  is polyani potential,  $R$  is gas constant (KJ/mol.K),  $T$  is temperature (K). The values of  $K_{ads}$  and  $\ln Q_m$  are obtained from the slop and intercept of the linear D-R plot of  $\ln q_e$  vs  $\varepsilon^2$  (Figs. S8 and S9).

### 3. As(III) Adsorption Kinetics

The pseudo-first-order equation is generally expressed as follows: [2]

$$\log(q_e - q_t) = \log q_e - \frac{k_{ads}}{2.303} t \quad \text{S4}$$

where  $q_e$  and  $q_t$  (both in mg/g) are the amount of As(III) adsorbed per unit mass of adsorbent at equilibrium and time “ $t$ ” respectively. The adsorption rate constant ( $k_{ads}$ ) for As(III) sorption was calculated from the slop of the linear plot  $\log(q_e - q_t)$  vs time ( $t$ ) as shown in Figs. S10 and S11 and Table S2.

The pseudo-second-order model is commonly expressed as follows: [2]

$$\frac{t}{q_t} = \frac{1}{h} + \frac{t}{q_e} \quad \text{S5}$$

where  $h$  is the initial sorption rate (mg/g min). The values of  $q_e$  (1/slope) and  $h$  (1/intercept) can be calculated from the plot of  $t/q_t$  vs  $t$  as shown in Figs. S10 and S11 and Table S2.

The intra-particle pore diffusion model can be expressed as follows:

$$q_t = k_i t^{1/2} \quad \text{S6}$$

where  $k_i$  ( $\text{mg g}^{-1} \text{min}^{1/2}$ ) is the intra-particle pore diffusion rate constant,  $q_t$  amount of As(III) adsorbed per unit mass of adsorbent at any time  $t$ , was plotted as a function of square root of time  $t^{1/2}$  as shown in Fig. S12.

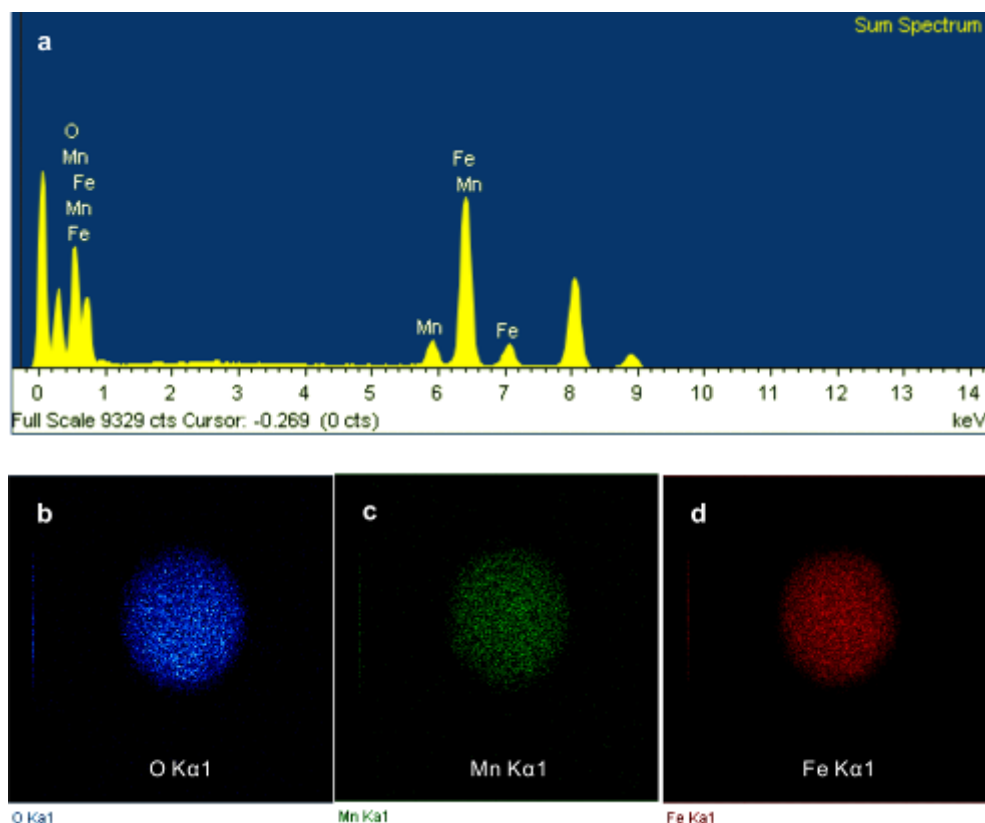

**Fig. S1** a) EDX spectra of  $\text{MnFe}_2\text{O}_4$  NCs; b-d) Corresponding elemental mapping of O K $\alpha$ 1, Mn K $\alpha$ 1, and Fe K $\alpha$ 1, respectively.

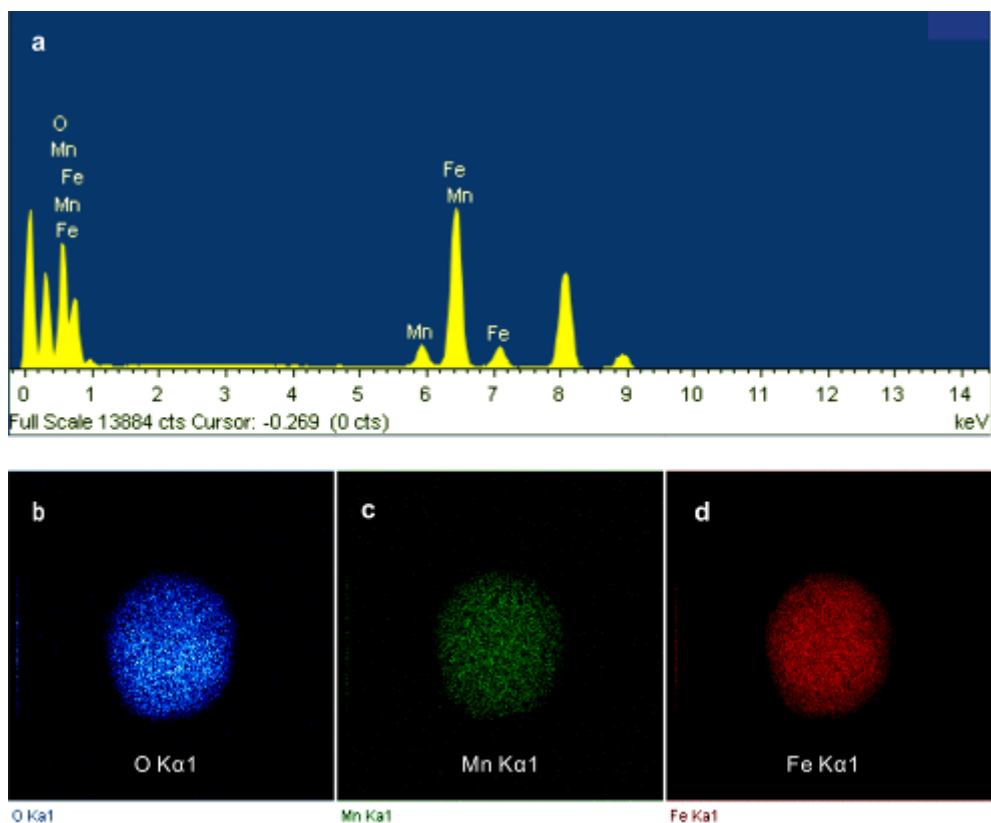

**Fig. S2** a) EDX spectra of  $\text{MnFe}_2\text{O}_4$  NCs calcined at  $500^\circ\text{C}$  in air; b-d) Corresponding elemental mapping of O K $\alpha$ 1, Mn K $\alpha$ 1, and Fe K $\alpha$ 1, respectively.

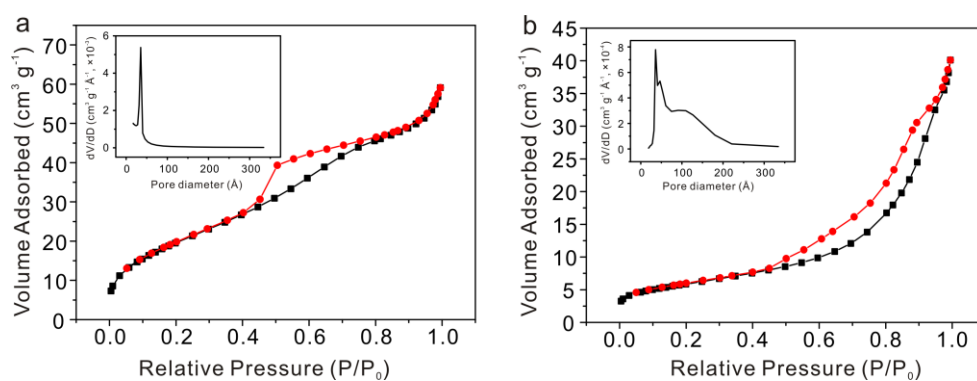

**Fig. S3** N<sub>2</sub> sorption isotherms and pore size distribution (inset) of  $\text{MnFe}_2\text{O}_4$  NCs (a) and  $\text{MnFe}_2\text{O}_4$  NCs calcined at  $500^\circ\text{C}$  in air (b).

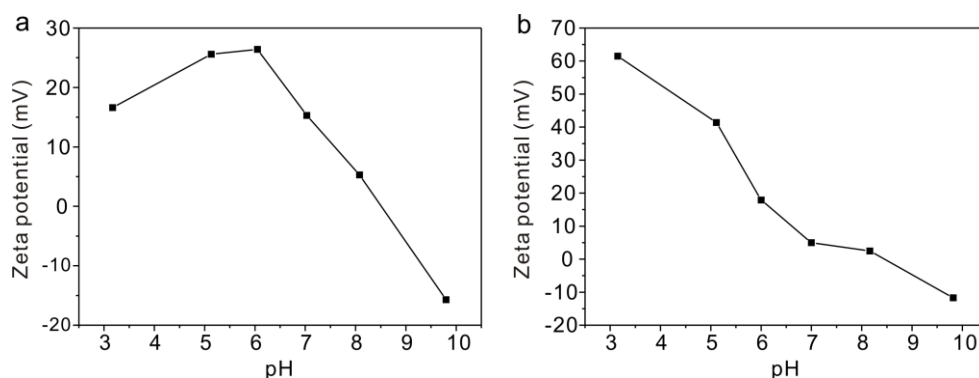

**Fig. S4** Zeta potential as a function of pH. a) MnFe<sub>2</sub>O<sub>4</sub> NCs; b) MnFe<sub>2</sub>O<sub>4</sub> NCs calcined at 500°C in air.

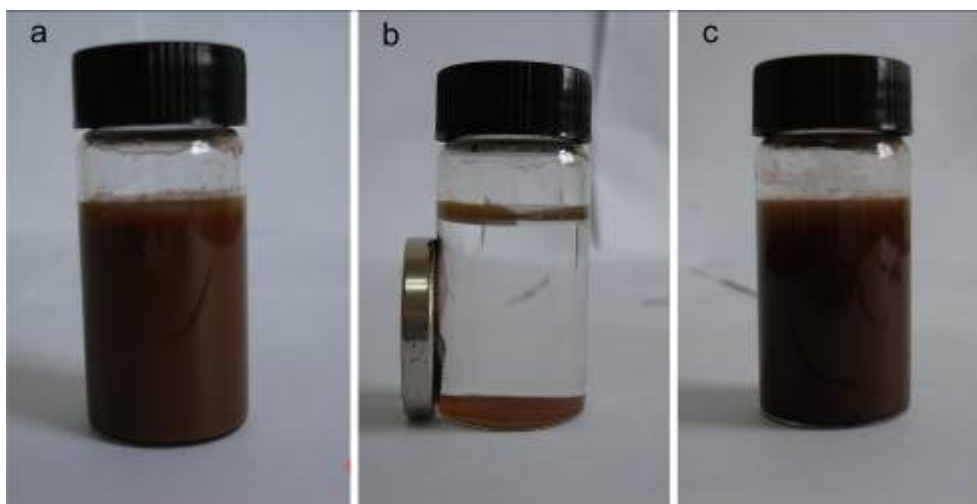

**Fig. S5** Photographs of MnFe<sub>2</sub>O<sub>4</sub> NCs dispersion in a vial. a) without magnetic field; b) with magnetic field for 1 min; c) after the magnetic field is taken away.

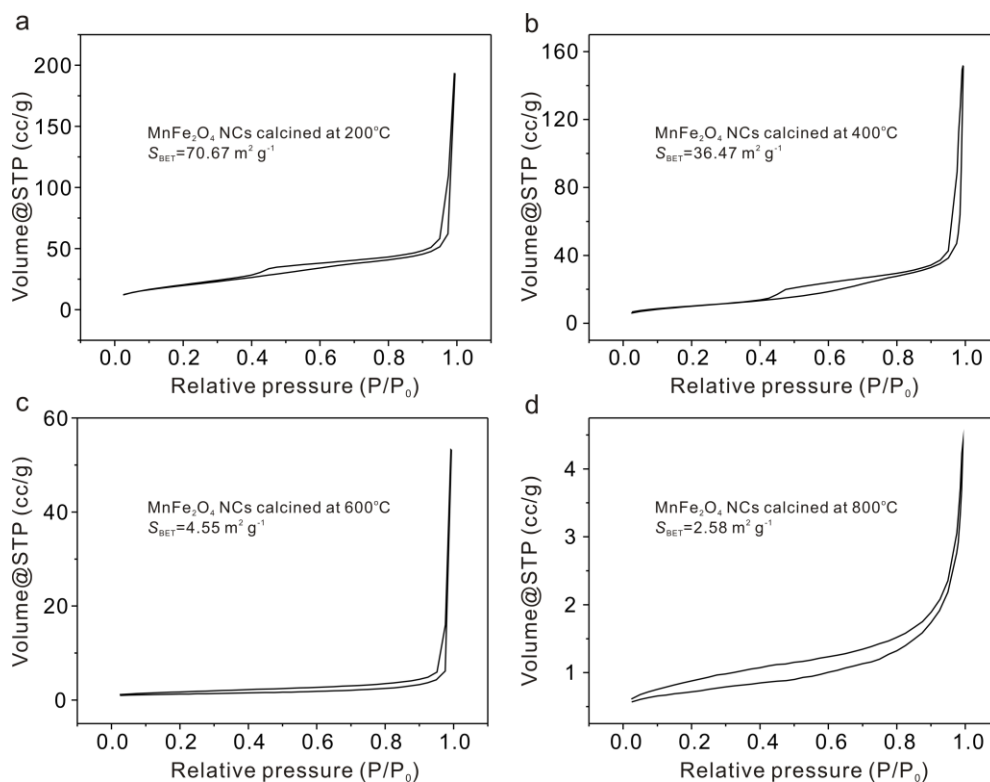

**Fig. S6** N<sub>2</sub> sorption isotherms of MnFe<sub>2</sub>O<sub>4</sub> NCs calcined at 200 °C (a), 400 °C (b), 600 °C (c), and 800 °C (b) in air, respectively.

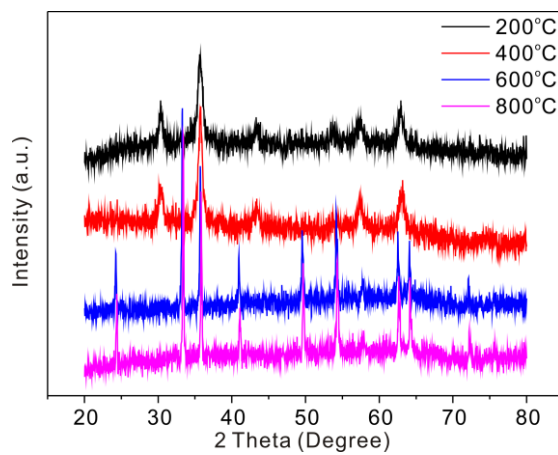

**Fig. S7** XRD patterns of MnFe<sub>2</sub>O<sub>4</sub> NCs calcined at 200 °C, 400 °C, 600 °C, 800 °C in air, respectively.

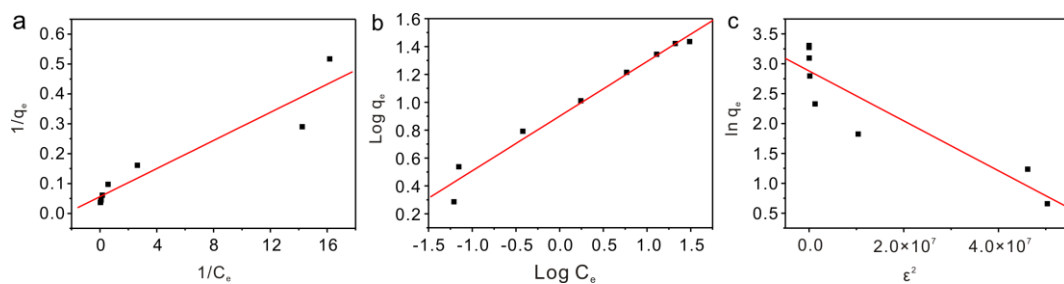

**Fig. S8** Fitting of the adsorption isotherms of As(III) on the MnFe<sub>2</sub>O<sub>4</sub> NCs by using Langmuir model (a), Freundlich model (b), and D-R isotherm model (c). The fitted parameters are summarized in Table S1.

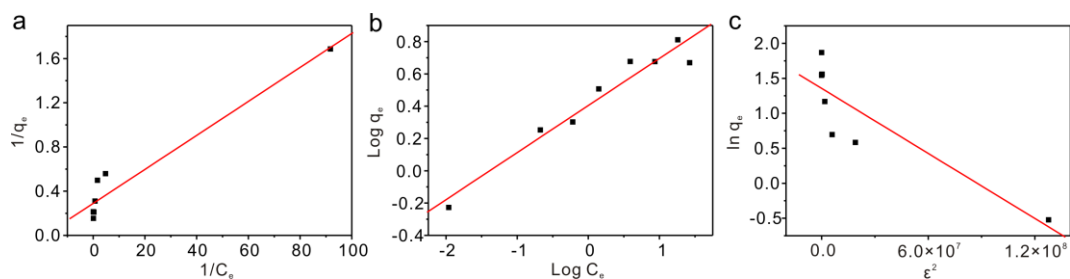

**Fig. S9** Fitting of the adsorption isotherms of As(III) on the calcined MnFe<sub>2</sub>O<sub>4</sub> NCs by using Langmuir model (a), Freundlich model (b), and D-R isotherm model (c). The fitted parameters are summarized in Table S1.

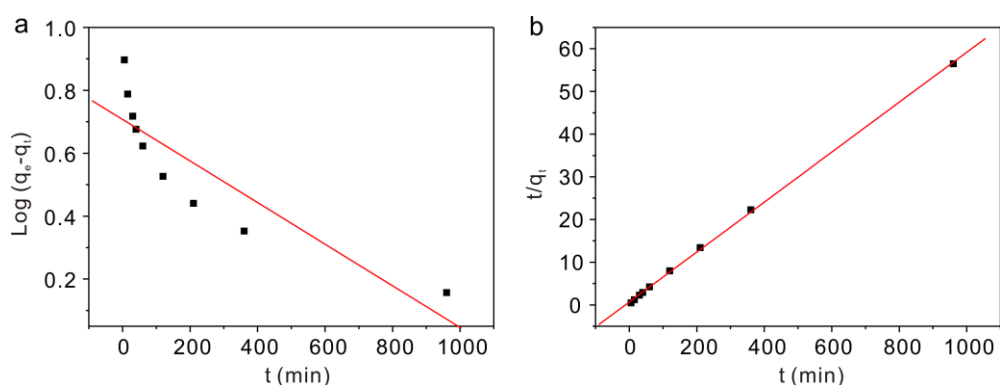

**Fig. S10** Fitting of the adsorption kinetics of As(III) on the MnFe<sub>2</sub>O<sub>4</sub> NCs by using pseudo-first-order kinetic model (a) and pseudo-second-order kinetic model (b). The fitted parameters are summarized in Table S2.



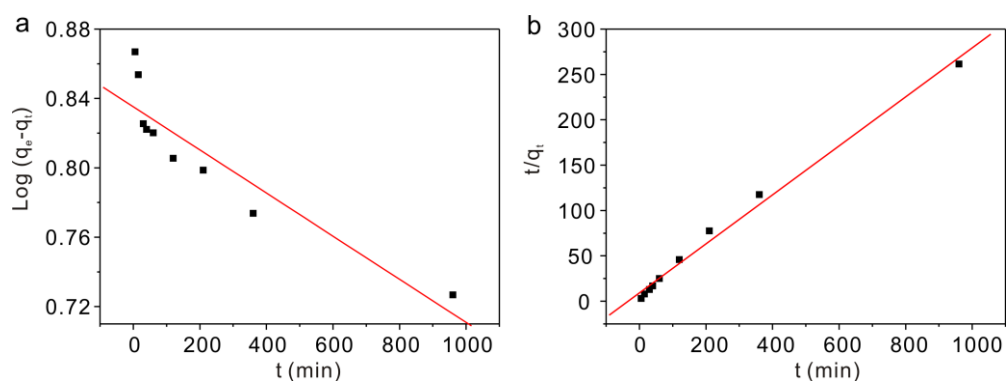

**Fig. S11** Fitting of the adsorption kinetics of As(III) on the calcined  $\text{MnFe}_2\text{O}_4$  NCs by using pseudo-first-order kinetic model (a) and pseudo-second-order kinetic model (b). The fitted parameters are summarized in Table S2.

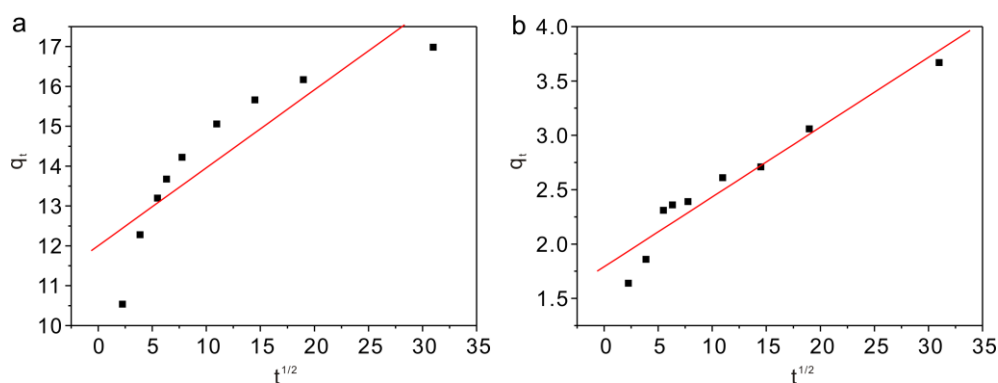

**Fig. S12** Fitting of the adsorption kinetics of As(III) on the  $\text{MnFe}_2\text{O}_4$  NCs (a) and the calcined  $\text{MnFe}_2\text{O}_4$  NCs (b) by using the intra-particle pore diffusion model. The fitted parameters are summarized in Table S2.

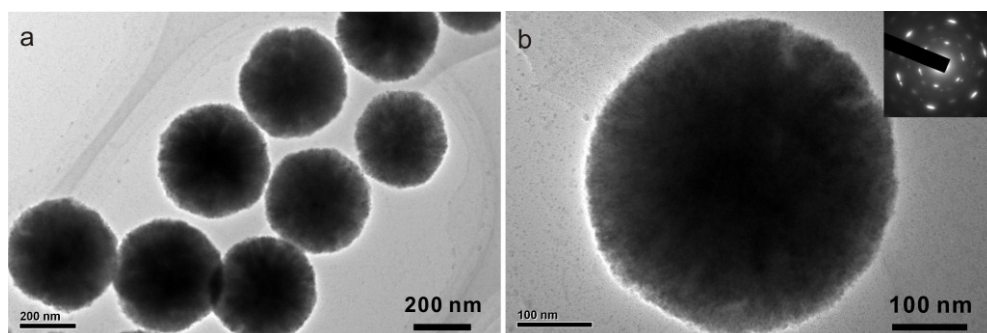

**Fig. S13** TEM images of the regenerated  $\text{MnFe}_2\text{O}_4$  NCs after 8 cycles of reuse at different magnifications. The inset is the corresponding SAED pattern.

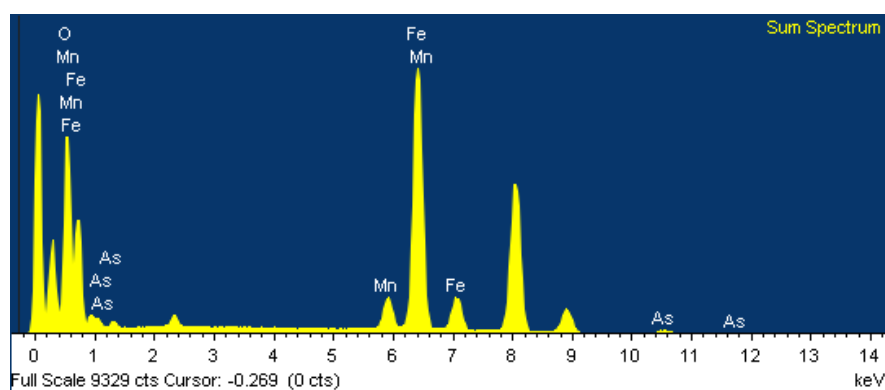

**Fig. S14** EDX spectra of  $\text{MnFe}_2\text{O}_4$  NCs after adsorbing As(III)

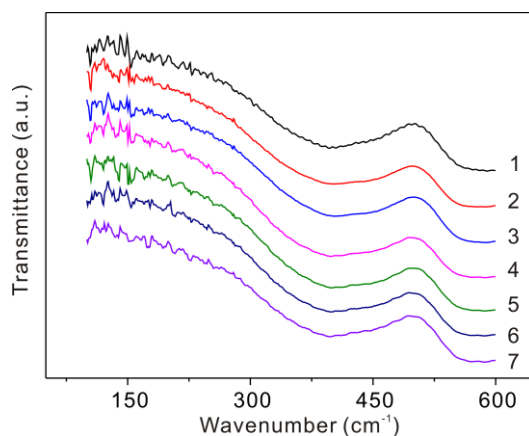

**Fig. S15** Far-IR spectra of  $\text{MnFe}_2\text{O}_4$  NCs (1) and  $\text{MnFe}_2\text{O}_4$  NCs after treatment in aqueous solutions of six different As(III) concentrations,  $1 \text{ mg L}^{-1}$  (2),  $10 \text{ mg L}^{-1}$  (3),  $20 \text{ mg L}^{-1}$  (4),  $30 \text{ mg L}^{-1}$  (5),  $40 \text{ mg L}^{-1}$  (6), and  $50 \text{ mg L}^{-1}$  (7), respectively.

**Table S1 Isotherm parameters for adsorption of As(III) on MnFe<sub>2</sub>O<sub>4</sub> NCs and MnFe<sub>2</sub>O<sub>4</sub> NCs calcined at 500°C.**

| Sample                                           | Langmuir isotherm                   |                           |       | Freundlich isotherm |       |       | D-R isotherm           |                             |       |
|--------------------------------------------------|-------------------------------------|---------------------------|-------|---------------------|-------|-------|------------------------|-----------------------------|-------|
|                                                  | $q_{\max}$<br>(mg g <sup>-1</sup> ) | $b$ (L mg <sup>-1</sup> ) | $R^2$ | $K_f$               | 1/n   | $R^2$ | $K_{\text{ads}}$       | $Q_m$ (mg g <sup>-1</sup> ) | $R^2$ |
| MnFe <sub>2</sub> O <sub>4</sub> NCs             | 17.8                                | 2.39                      | 0.899 | 7.95                | 0.392 | 0.974 | 4.176×10 <sup>-8</sup> | 17.83                       | 0.837 |
| Calcined<br>MnFe <sub>2</sub> O <sub>4</sub> NCs | 3.45                                | 18.85                     | 0.939 | 2.535               | 0.291 | 0.944 | 1.55×10 <sup>-8</sup>  | 3.88                        | 0.773 |

**Table S2 Fitted parameters of As(III) adsorption kinetics and diffusion on MnFe<sub>2</sub>O<sub>4</sub> NCs and MnFe<sub>2</sub>O<sub>4</sub> NCs calcined at 500°C.**

| Sample                                        | Pseudo-second-order |                                       |        | Pseudo-first-order                 |       | Intra-particle pore diffusion model |       |
|-----------------------------------------------|---------------------|---------------------------------------|--------|------------------------------------|-------|-------------------------------------|-------|
|                                               | $h$                 | $(\text{mg g}^{-1} \text{ min}^{-1})$ | $R^2$  | $k_{\text{ads}} (\text{min}^{-1})$ | $R^2$ | $K_i$                               | $R^2$ |
|                                               |                     |                                       |        |                                    |       |                                     |       |
| MnFe <sub>2</sub> O <sub>4</sub> NCs          | 1.52                |                                       | 0.9996 | $1.523 \times 10^{-3}$             | 0.775 | 0.1955                              | 0.774 |
| Calcined MnFe <sub>2</sub> O <sub>4</sub> NCs | 0.109               |                                       | 0.992  | $2.864 \times 10^{-4}$             | 0.833 | 0.0642                              | 0.928 |

[1] Chen, H. M.; Chu, P. K.; He, J. H.; Hu, T.; Yang, M. Q. Porous magnetic manganese oxide nanostructures: Synthesis and their application in water treatment. *J. Colloid Interf. Sci.* **2011**, *359*, 68-74.

[2] Dhoble, R. M.; Lunge, S.; Bhole, A. G.; Rayalu, S., Magnetic binary oxide particles (MBOP): A promising adsorbent for removal of As (III) in water. *Water Res* **2011**, *45* (16), 4769-4781.
